# Supplementary material for: Alterations in serum protein glycopatterns related to small cell lung cancer, adenocarcinoma and squamous carcinoma of the lung
Source: Royal Society of Chemistry journal article supplement (doi:10.1039/c9ra10077f), 2020-01-01
Supplement: c9ra10077f1.pdf [file c9ra10077f1.pdf]

## Alterations of Serum Protein Glycopatterns related to Lung Cancer (SCLC, ADC, and SqCC)

Liyuan Jia<sup>1†</sup>, Tianran Ma<sup>1†</sup>, Yiqian Liang<sup>2</sup>, Haoqi Du<sup>1</sup>, Jian Shu<sup>1</sup>, Xiawei Liu<sup>1</sup>, Zhiwei Zhang<sup>1</sup>, Hanjie Yu<sup>1</sup>, Mingwei Chen<sup>2\*</sup>, Zheng Li<sup>1\*</sup>

Supporting Table 1. Glycopattern in pooled serum from HVs and patients with benign lung disease and LD-SCLC, ED-SCLC by the lectin microarray analysis based on data of 16 lectins giving significant signal.

| Lectin  | Specificity                                                                                     | HV                | BPD               | LD-SCLC           | ED-SCLC           |
|---------|-------------------------------------------------------------------------------------------------|-------------------|-------------------|-------------------|-------------------|
| Jacalin | Gal $\beta$ 1-3GalNAc $\alpha$ -Ser/Thr(T), GalNAc $\alpha$ -Ser/Thr(Tn)                        | 0.069 $\pm$ 0.016 | 0.04 $\pm$ 0.002  | 0.039 $\pm$ 0.008 | 0.076 $\pm$ 0.043 |
| HHL     | High-Mannose, Man $\alpha$ 1-3Man, Man $\alpha$ 1-6Man, Man5-GlcNAc2-Asn                        | 0.008 $\pm$ 0.001 | 0.016 $\pm$ 0.005 | 0.008 $\pm$ 0.002 | 0.013 $\pm$ 0.002 |
| WFA     | terminating in GalNAc $\alpha$ / $\beta$ 1-3/6Gal                                               | 0.016 $\pm$ 0.003 | 0.021 $\pm$ 0.007 | 0.027 $\pm$ 0.004 | 0.023 $\pm$ 0.004 |
| PHA-E   | Bisecting GlcNAc, biantennary complex-type N-glycan with outer Gal                              | 0.027 $\pm$ 0.004 | 0.034 $\pm$ 0.005 | 0.023 $\pm$ 0.004 | 0.019 $\pm$ 0.004 |
| EEL     | Gal $\alpha$ 1-3(Fuca1-2) Gal (blood group B antigen)                                           | 0.001 $\pm$ 0.002 | 0.008 $\pm$ 0.012 | 0.007 $\pm$ 0.012 | 0.002 $\pm$ 0.002 |
| LTL     | Fuca1-2Gal $\beta$ 1-4GlcNAc, Fuca1-3(Gal $\beta$ 1-4)GlcNAc                                    | 0.021 $\pm$ 0.003 | 0.024 $\pm$ 0.007 | 0.015 $\pm$ 0.001 | 0.021 $\pm$ 0.007 |
| LEL     | (GlcNAc) <sub>n</sub> , high mannose-type N-glycans                                             | 0.011 $\pm$ 0.001 | 0.015 $\pm$ 0.006 | 0.007 $\pm$ 0.002 | 0.013 $\pm$ 0.002 |
| GSL-I   | $\alpha$ GalNAc, $\alpha$ Gal, anti-A and B                                                     | 0.009 $\pm$ 0.01  | 0.021 $\pm$ 0.003 | 0.012 $\pm$ 0.007 | 0.004 $\pm$ 0.004 |
| DBA     | $\alpha$ GalNAc, Tn antigen, GalNAc $\alpha$ 1-3(Fuca1-2)Gal (blood group A antigen)            | 0.009 $\pm$ 0.001 | 0.016 $\pm$ 0.006 | 0.009 $\pm$ 0.002 | 0.012 $\pm$ 0.004 |
| LCA     | $\alpha$ -D-Man, Fuca-1,6GlcNAc, $\alpha$ -D-Glc trimers and tetramers of GlcNAc, core (GlcNAc) | 0.187 $\pm$ 0.013 | 0.099 $\pm$ 0.037 | 0.183 $\pm$ 0.028 | 0.114 $\pm$ 0.082 |
| STL     | of N-glycan, oligosaccharide containing GlcNAc and MurNAc                                       | 0.033 $\pm$ 0.007 | 0.026 $\pm$ 0.012 | 0.052 $\pm$ 0.005 | 0.044 $\pm$ 0.004 |
| BS-I    | $\alpha$ -Gal, $\alpha$ -GalNAc, Gal $\alpha$ -1,3Gal, Gal $\alpha$ -1,6Glc                     | 0.008 $\pm$ 0.006 | 0.016 $\pm$ 0.004 | 0.012 $\pm$ 0.002 | 0.016 $\pm$ 0.008 |
| NPA     | High-Mannose, Man $\alpha$ 1-6Man                                                               | 0.003 $\pm$ 0.004 | 0.012 $\pm$ 0.007 | 0.005 $\pm$ 0.002 | 0.006 $\pm$ 0.002 |

|        |                                                                                |                   |                   |                   |                   |
|--------|--------------------------------------------------------------------------------|-------------------|-------------------|-------------------|-------------------|
| UEA-I  | Fuc $\alpha$ 1-2Gal $\beta$ 1-4Glc(NAc)                                        | 0.01 $\pm$ 0.009  | 0.019 $\pm$ 0.001 | 0.017 $\pm$ 0.007 | 0.016 $\pm$ 0.003 |
| RCA120 | $\beta$ -Gal, Gal $\beta$ -1,4GlcNAc (type II), Gal $\beta$ 1-3GlcNAc (type I) | 0 $\pm$ 0         | 0.014 $\pm$ 0.005 | 0.018 $\pm$ 0.003 | 0.021 $\pm$ 0.003 |
| SNA    | Sia2-6Gal/GalNAc                                                               | 0.025 $\pm$ 0.005 | 0.033 $\pm$ 0.009 | 0.019 $\pm$ 0.005 | 0.021 $\pm$ 0.005 |

---

Supporting Table 2. Fold change of the serum glycopatterns based upon ratio of the NFIs of each lectin from HVs, BPD, LD-SCLC and ED-SCLC patients.

| Lectin  | Specificity                                                                     | Compared with HV ( <i>p</i> value) <sup>a</sup> |              |              | Compared with each other ( <i>p</i> value) <sup>b</sup> |             |                 |
|---------|---------------------------------------------------------------------------------|-------------------------------------------------|--------------|--------------|---------------------------------------------------------|-------------|-----------------|
|         |                                                                                 | BPD/HV                                          | LD-SCLC/HV   | ED-SCLC/HV   | LD-SCLC/BPD                                             | ED-SCLC/BPD | ED-SCLC/LD-SCLC |
| BS-I    | $\alpha$ -Gal, $\alpha$ -GalNAc, Gal $\alpha$ -1,3Gal, Gal $\alpha$ -1,6Glc     | 2.07(0.008)                                     | 1.51(0.024)  | 2.08(0.002)  | -                                                       | -           | -               |
| RCA120  | $\beta$ -Gal, Gal $\beta$ -1,4GlcNAc (type II), Gal $\beta$ 1-3GlcNAc (type I)  | / (<0.001)                                      | / (<0.001)   | / (<0.001)   | -                                                       | -           | -               |
| UEA-I   | Fuc $\alpha$ 1-2Gal $\beta$ 1-4Glc(NAc)                                         | 1.91(0.017)                                     | -            | 1.62(0.026)  | -                                                       | -           | -               |
| RCA120  | $\beta$ -Gal, Gal $\beta$ -1,4GlcNAc (type II), Gal $\beta$ 1-3GlcNAc (type I)  | / (<0.001)                                      | / (<0.001)   | / (<0.001)   | -                                                       | -           | -               |
| WFA     | terminating in GalNAc $\alpha$ / $\beta$ 1-3/6Gal                               | -                                               | 1.69(<0.001) | -            | -                                                       | -           | -               |
| SNA     | Sia2-6Gal/GalNAc                                                                | -                                               | -            | -            | 0.59(0.005)                                             | 0.63(0.049) | -               |
| LEL     | (GlcNAc) <sub>n</sub> , high mannose-type N-glycans                             | -                                               | -            | -            | 0.50(0.021)                                             | -           | 1.76(0.014)     |
| LTL     | Fuc $\alpha$ 1-2Gal $\beta$ 1-4GlcNAc, Fuc $\alpha$ 1-3(Gal $\beta$ 1-4) GlcNAc | -                                               | -            | -            | 0.60(0.006)                                             | -           | -               |
| PHA-E   | Bisecting GlcNAc, biantennary complex-type N-glycan with outer Gal              | -                                               | -            | -            | -                                                       | 0.55(0.016) | -               |
| Jacalin | Gal $\beta$ 1-3GalNAc $\alpha$ -Ser/Thr(T), GalNAc $\alpha$ -Ser/Thr(Tn)        | 0.58(0.043)                                     | 0.56(0.006)  | -            | -                                                       | 1.91(0.023) | 1.97(0.042)     |
| LCA     | $\alpha$ -D-Man, Fuc $\alpha$ -1,6GlcNAc, $\alpha$ -D-Glc                       | 0.53(0.021)                                     | -            | 0.61(<0.001) | 1.84(0.032)                                             | -           | 0.63(0.028)     |
| EEL     | Gal $\alpha$ 1-3(Fuc $\alpha$ 1-2) Gal (blood group B antigen)                  | 6.71(0.006)                                     | 5.94(<0.001) | 1.99(0.023)  | -                                                       | 0.30(0.047) | 0.34(0.012)     |

|       |                                                                                                                                                                                   |              |             |             |             |             |              |
|-------|-----------------------------------------------------------------------------------------------------------------------------------------------------------------------------------|--------------|-------------|-------------|-------------|-------------|--------------|
| GSL-I | $\alpha$ GalNAc, $\alpha$ Gal, anti-A and B                                                                                                                                       | 2.37(0.043)  | -           | 0.50(0.016) | 0.58(0.035) | 0.21(0.039) | 0.36(<0.001) |
| NPA   | High-Mannose, Man $\alpha$ 1-6Man                                                                                                                                                 | 4.66(<0.001) | -           | 2.22(0.041) | 0.37(0.005) | 0.48(0.038) | -            |
| HHL   | High-Mannose, Man $\alpha$ 1-3Man, Man $\alpha$ 1-6Man, Man5-GlcNAc2-Asn trimers and tetramers of GlcNAc, core (GlcNAc) of N-glycan, oligosaccharide containing GlcNAc and MurNAc | 2.06(0.029)  | -           | 1.73(0.016) | 0.49(0.030) | -           | 1.71(0.004)  |
| STL   | $\alpha$ GalNAc, Tn antigen, GalNAc $\alpha$ 1-3(Fuc $\alpha$ 1-2) Gal (blood group A antigen)                                                                                    | -            | 1.55(0.046) | -           | 1.97(0.007) | 1.68(0.019) | -            |
| DBA   |                                                                                                                                                                                   | 1.87(0.010)  | -           | -           | 0.59(0.006) | -           | -            |

<sup>a</sup> The NFIs of each lectin from BLD, LD-SCLC, and ED-SCLC groups were compared with that from HV group based on their fold change (i.e., BLD/HV, LD-SCLC/HV, and ED-SCLC/HV), respectively.

<sup>b</sup> The NFIs of each lectin from three disease groups were compared with BPD and each other based upon fold change in pairs, i.e., LD-SCLC/BLD, ED-SCLC/BLD, and ED-SCLC/LD-SCLC. -, no significant difference; /, the denominator of the fold-change was zero.

Supporting Table 3. Glycopattern in pooled serum from HVs, BPD, ADC-ES and ADC-AS patients by the lectin microarray analysis based on data of 23 lectins giving significant signal.

| Lectin | Specificity                                                                           | HV                | BPD               | ES-ADC            | AS-ADC            |
|--------|---------------------------------------------------------------------------------------|-------------------|-------------------|-------------------|-------------------|
| HHL    | High-Mannose, Man $\alpha$ 1-3Man, Man $\alpha$ 1-6Man, Man5-GlcNAc2-Asn              | 0.008 $\pm$ 0.001 | 0.016 $\pm$ 0.005 | 0.013 $\pm$ 0.001 | 0.013 $\pm$ 0.01  |
| WFA    | terminating in GalNAc $\alpha$ / $\beta$ 1-3/6Gal                                     | 0.016 $\pm$ 0.003 | 0.021 $\pm$ 0.007 | 0.024 $\pm$ 0.005 | 0.035 $\pm$ 0.003 |
| MAL-II | Sia $\alpha$ 2-3Gal $\beta$ 1-4Glc(NAc)/Glc                                           | 0.021 $\pm$ 0.004 | 0.029 $\pm$ 0.005 | 0.03 $\pm$ 0.001  | 0.034 $\pm$ 0.001 |
| PTL-I  | GalNAc, GalNAc $\alpha$ -1,3Gal, GalNAc $\alpha$ -1,3Gal $\beta$ -1,3/4Glc            | 0.014 $\pm$ 0.003 | 0.018 $\pm$ 0.003 | 0.021 $\pm$ 0.003 | 0.017 $\pm$ 0.008 |
| EEL    | Gal $\alpha$ 1-3(Fuca1-2) Gal (blood group B antigen)                                 | 0.001 $\pm$ 0.002 | 0.008 $\pm$ 0.012 | 0.024 $\pm$ 0.003 | 0.021 $\pm$ 0.013 |
| AAL    | Fuca1-6 GlcNAc (core fucose), Fuca1-3(Gal $\beta$ 1-4) GlcNAc                         | 0.023 $\pm$ 0.005 | 0.024 $\pm$ 0     | 0.036 $\pm$ 0.004 | 0.06 $\pm$ 0.018  |
| MPL    | Gal $\beta$ 1-3GalNAc, GalNAc                                                         | 0.011 $\pm$ 0.009 | 0.014 $\pm$ 0.008 | 0.028 $\pm$ 0.006 | 0.031 $\pm$ 0.015 |
| LEL    | (GlcNAc) <sub>n</sub> , high mannose-type N-glycans                                   | 0.011 $\pm$ 0.001 | 0.015 $\pm$ 0.006 | 0.027 $\pm$ 0.003 | 0.023 $\pm$ 0.004 |
| GSL-I  | $\alpha$ GalNAc, $\alpha$ Gal, anti-A and B                                           | 0.009 $\pm$ 0.01  | 0.021 $\pm$ 0.003 | 0.031 $\pm$ 0.005 | 0.02 $\pm$ 0.011  |
| DBA    | $\alpha$ GalNAc, Tn antigen, GalNAc $\alpha$ 1-3(Fuca1-2) Gal (blood group A antigen) | 0.009 $\pm$ 0.001 | 0.016 $\pm$ 0.006 | 0.021 $\pm$ 0.005 | 0.024 $\pm$ 0.001 |
| LCA    | $\alpha$ -D-Man, Fuca-1,6GlcNAc, $\alpha$ -D-Glc                                      | 0.187 $\pm$ 0.013 | 0.099 $\pm$ 0.037 | 0.044 $\pm$ 0.008 | 0.038 $\pm$ 0.014 |

|        |                                                                                                          |                   |                   |                   |                   |
|--------|----------------------------------------------------------------------------------------------------------|-------------------|-------------------|-------------------|-------------------|
| RCA120 | $\beta$ -Gal, Gal $\beta$ -1,4GlcNAc (type II), Gal $\beta$ 1-3GlcNAc (type I)                           | 0 $\pm$ 0         | 0.014 $\pm$ 0.005 | 0.018 $\pm$ 0.003 | 0.021 $\pm$ 0.003 |
| STL    | trimers and tetramers of GlcNAc, core (GlcNAc) of N-glycan, oligosaccharide containing GlcNAc and MurNAc | 0.033 $\pm$ 0.007 | 0.026 $\pm$ 0.012 | 0.027 $\pm$ 0.002 | 0.042 $\pm$ 0.008 |
| BS-I   | $\alpha$ -Gal, $\alpha$ -GalNAc, Gal $\alpha$ -1,3Gal, Gal $\alpha$ -1,6Glc                              | 0.008 $\pm$ 0.006 | 0.016 $\pm$ 0.004 | 0.009 $\pm$ 0.003 | 0.005 $\pm$ 0.002 |
| ConA   | High-Mannose, Man $\alpha$ 1-6(Man $\alpha$ 1-3) Man, terminal GlcNAc                                    | 0.021 $\pm$ 0.004 | 0.021 $\pm$ 0.003 | 0.034 $\pm$ 0.001 | 0.028 $\pm$ 0.008 |
| PTL-II | Gal, blood group H, T-antigen                                                                            | 0.01 $\pm$ 0.002  | 0.013 $\pm$ 0.003 | 0.024 $\pm$ 0.008 | 0.014 $\pm$ 0.003 |
| VVA    | terminal GalNAc, GalNAc $\alpha$ -Ser/Thr(Tn), GalNAc $\alpha$ 1-3Gal                                    | 0.029 $\pm$ 0.006 | 0.034 $\pm$ 0.009 | 0.041 $\pm$ 0.002 | 0.026 $\pm$ 0.003 |
| NPA    | High-Mannose, Man $\alpha$ 1-6Man                                                                        | 0.003 $\pm$ 0.004 | 0.012 $\pm$ 0.007 | 0.025 $\pm$ 0.002 | 0.022 $\pm$ 0.006 |
| WGA    | Multivalent Sia and (GlcNAc) <sub>n</sub>                                                                | 0.064 $\pm$ 0.012 | 0.061 $\pm$ 0.021 | 0.026 $\pm$ 0.002 | 0.012 $\pm$ 0.004 |
| UEA-I  | Fuc $\alpha$ 1-2Gal $\beta$ 1-4Glc(NAc)                                                                  | 0.01 $\pm$ 0.009  | 0.019 $\pm$ 0.001 | 0.007 $\pm$ 0.001 | 0.006 $\pm$ 0.003 |
| PWM    | BraBLDhed (LacNAc) <sub>n</sub>                                                                          | 0.026 $\pm$ 0.003 | 0.025 $\pm$ 0.001 | 0.015 $\pm$ 0.001 | 0.012 $\pm$ 0.004 |
| MAL-I  | Gal $\beta$ -1,4GlcNAc, Sia $\alpha$ 2-3Gal, Gal $\beta$ 1-3GlcNAc, Sia $\alpha$ 2-3                     | 0.018 $\pm$ 0.002 | 0.02 $\pm$ 0.006  | 0.03 $\pm$ 0.001  | 0.03 $\pm$ 0.004  |
| SNA    | Sia2-6Gal/GalNAc                                                                                         | 0.025 $\pm$ 0.005 | 0.033 $\pm$ 0.009 | 0.034 $\pm$ 0.001 | 0.051 $\pm$ 0.015 |

---

Supporting Table 4. Fold change of the serum glycoproteins based upon ratio of the NFIs of each lectin from HVs, BPD, ADC-ES and ADC-AS patients.

| Lectin  | Specificity                                                                                              | Compared with HV ( <i>p</i> value) <sup>a</sup> |             |             | Compared with each other ( <i>p</i> value) <sup>b</sup> |             |               |
|---------|----------------------------------------------------------------------------------------------------------|-------------------------------------------------|-------------|-------------|---------------------------------------------------------|-------------|---------------|
|         |                                                                                                          | BPD/HV                                          | ADC-ES/HV   | ADC-AS/HV   | ADC-ES/BPD                                              | ADC-AS/BPD  | ADC-AS/ADC-ES |
| HHL     | High-Mannose, Man $\alpha$ 1-3Man, Man $\alpha$ 1-6Man, Man5-GlcNAc2-Asn                                 | 2.06(0.024)                                     | 1.72(0.008) | 1.64(0.041) | -                                                       | -           | -             |
| PTL-I   | GalNAc, GalNAc $\alpha$ -1,3Gal, GalNAc $\alpha$ -1,3Gal $\beta$ -1,3/4Glc                               | -                                               | 1.55(0.016) | -           | -                                                       | -           | -             |
| MAL-II  | Sia $\alpha$ 2-3Gal $\beta$ 1-4Glc(NAc)/Glc                                                              | -                                               | -           | 1.64(0.001) | -                                                       | -           | -             |
| STL     | trimers and tetramers of GlcNAc, core (GlcNAc) of N-glycan, oligosaccharide containing GlcNAc and MurNAc | -                                               | -           | -           | -                                                       | 1.60(0.017) | 1.57(0.009)   |
| VVA     | terminal GalNAc, GalNAc $\alpha$ -Ser/Thr(Tn), GalNAc $\alpha$ 1-3Gal                                    | -                                               | -           | -           | -                                                       | -           | 0.64(0.011)   |
| Jacalin | Gal $\beta$ 1-3GalNAc $\alpha$ -Ser/Thr(T), GalNAc $\alpha$ -Ser/Thr(Tn)                                 | 0.58(0.043)                                     | 0.07(0.016) | 0.09(0.005) | 0.12(0.032)                                             | 0.16(0.007) | -             |
| LCA     | $\alpha$ -D-Man, Fuc $\alpha$ -1,6GlcNAc, $\alpha$ -D-Glc                                                | 0.53(0.014)                                     | 0.24(0.001) | 0.20(0.001) | 0.45(0.033)                                             | 0.38(0.025) | -             |



|        |                                                                      |             |              |              |             |              |             |
|--------|----------------------------------------------------------------------|-------------|--------------|--------------|-------------|--------------|-------------|
| WGA    | Multivalent Sia and (GlcNAc) <sub>n</sub>                            | -           | 0.40(0.005)  | 0.19(0.001)  | 0.42(0.008) | 0.20(0.001)  | 0.46(0.020) |
| PWM    | BraBPDhed (LacNAc) <sub>n</sub>                                      | -           | 0.56(0.001)  | 0.45(<0.001) | 0.59(0.002) | 0.20(<0.001) | -           |
| BS-I   | α-Gal, α-GalNAc, Galα-1,3Gal, Galα-1,6Glc                            | 2.07(0.043) | -            | -            | 0.59(0.012) | 0.33(0.030)  | 0.56(0.038) |
| UEA-I  | Fuca1-2Galβ1-4Glc(NAc)                                               | 1.91(0.045) | -            | 0.60(0.012)  | 0.38(0.020) | 0.20(0.023)  | -           |
| EEL    | Galα1-3(Fuca1-2) Gal (blood group B antigen)                         | 6.71(0.041) | 21.24(0.016) | 18.44(0.037) | 3.17(0.032) | 2.75(0.011)  | -           |
| NPA    | High-Mannose, Manα1-6Man                                             | 4.66(0.040) | 9.48(<0.001) | 8.46(0.001)  | 2.04(0.013) | 1.82(0.037)  | -           |
| DBA    | αGalNAc, Tn antigen, GalNAcα1-3(Fuca1-2) Gal (blood group A antigen) | 1.87(0.046) | 2.39(0.006)  | 2.83(0.001)  | -           | 1.52(0.033)  | -           |
| RCA120 | β-Gal, Galβ-1,4GlcNAc (type II), Galβ1-3GlcNAc (type I)              | /( <0.001)  | /( <0.001)   | /( <0.001)   | -           | 1.53(<0.001) | -           |
| GSL-I  | αGalNAc, αGal, anti-A and B                                          | 2.37(0.027) | 3.44(0.019)  | 2.21(0.049)  | -           | -            | 0.64(0.022) |
| AAL    | Fuca1-6 GlcNAc (core fucose), Fuca1-3(Galβ1-4) GlcNAc                | -           | 1.55(0.014)  | 2.55(0.002)  | 1.51(0.015) | 2.49(0.018)  | 1.65(0.018) |
| MPL    | Galβ1-3GalNAc, GalNAc                                                | -           | 2.51(0.041)  | 2.78(0.024)  | 2.06(0.031) | 2.28(0.041)  | -           |

|        |                                                                                      |   |              |             |             |             |             |
|--------|--------------------------------------------------------------------------------------|---|--------------|-------------|-------------|-------------|-------------|
| LEL    | (GlcNAc) <sub>n</sub> , high mannose-type N-glycans                                  | - | 2.60(<0.001) | 2.17(0.003) | 1.84(0.003) | 1.54(0.040) | -           |
| MAL-I  | Gal $\beta$ -1,4GlcNAc, Sia $\alpha$ 2-3Gal, Gal $\beta$ 1-3GlcNAc, Sia $\alpha$ 2-3 | - | 1.68(0.004)  | 1.66(0.005) | 1.50(0.012) | 0.20(0.014) | -           |
| WFA    | terminating in GalNAc $\alpha$ / $\beta$ 1-3/6Gal                                    | - | 1.51(0.018)  | 2.15(0.001) | -           | 1.68(0.007) | -           |
| ConA   | High-Mannose, Man $\alpha$ 1-6(Man $\alpha$ 1-3) Man, terminal GlcNAc                | - | 1.57(0.013)  | -           | 1.60(0.031) | -           | -           |
| PTL-II | Gal, blood group H, T-antigen                                                        | - | 2.33(0.010)  | -           | 1.78(0.032) | -           | 0.61(0.010) |
| SNA    | Sia2-6Gal/GalNAc                                                                     | - | -            | 2.08(0.008) | -           | 0.20(0.044) | 1.51(0.015) |

<sup>a</sup> The NFIs of each lectin from HB, BPD, ADC-ES and ADC-AS groups were compared with that from HV group based on their fold change (i.e., BPD/HB, ADC-ES/HV, and ADC-AS/HV), respectively.

<sup>b</sup> The NFIs of each lectin from three disease groups were compared with that from BPD group based on their fold change and compared with each other on their fold change (i.e., ADC-ES/BPD, ADC-AS/BPD, and ADC-AS/ADC-ES. -, no significant difference; /, the denominator of the fold change was zero).

Supporting Table 5. Glycopatternin in sera from HVs, BPD, SqCC-ES and SqCC-AS by the lectin microarray analysis based on data of 19

lectins giving significant signal.

| Lectin | Specificity                                                                                              | HV                | BPD               | SqCC-ES           | SqCC-AS           |
|--------|----------------------------------------------------------------------------------------------------------|-------------------|-------------------|-------------------|-------------------|
| HHL    | High-Mannose, Man $\alpha$ 1-3Man, Man $\alpha$ 1-6Man, Man5-GlcNAc2-Asn                                 | 0.008 $\pm$ 0.001 | 0.016 $\pm$ 0.005 | 0.009 $\pm$ 0.009 | 0.013 $\pm$ 0.004 |
| MAL-II | Sia $\alpha$ 2-3Gal $\beta$ 1-4Glc(NAc)/Glc                                                              | 0.021 $\pm$ 0.004 | 0.029 $\pm$ 0.005 | 0.018 $\pm$ 0.007 | 0.016 $\pm$ 0.004 |
| PHA-E  | Bisecting GlcNAc, biantennary complex-type N-glycan with outer Gal                                       | 0.027 $\pm$ 0.004 | 0.034 $\pm$ 0.005 | 0.03 $\pm$ 0.005  | 0.022 $\pm$ 0.004 |
| SJA    | Terminal in GalNAc and Gal                                                                               | 0.043 $\pm$ 0.008 | 0.039 $\pm$ 0.001 | 0.032 $\pm$ 0.005 | 0.022 $\pm$ 0.003 |
| EEL    | Gal $\alpha$ 1-3(Fuc $\alpha$ 1-2) Gal (blood group B antigen)                                           | 0.001 $\pm$ 0.002 | 0.008 $\pm$ 0.012 | 0.016 $\pm$ 0.004 | 0.024 $\pm$ 0.004 |
| MPL    | Gal $\beta$ 1-3GalNAc, GalNAc                                                                            | 0.011 $\pm$ 0.009 | 0.014 $\pm$ 0.008 | 0.037 $\pm$ 0.013 | 0.029 $\pm$ 0.006 |
| LEL    | (GlcNAc) <sub>n</sub> , high mannose-type N-glycans                                                      | 0.011 $\pm$ 0.001 | 0.015 $\pm$ 0.006 | 0.019 $\pm$ 0.006 | 0.02 $\pm$ 0.002  |
| GSL-I  | $\alpha$ GalNAc, $\alpha$ Gal, anti-A and B                                                              | 0.009 $\pm$ 0.01  | 0.021 $\pm$ 0.003 | 0.016 $\pm$ 0.003 | 0.016 $\pm$ 0.003 |
| DBA    | $\alpha$ GalNAc, Tn antigen, GalNAc $\alpha$ 1-3(Fuc $\alpha$ 1-2) Gal (blood group A antigen)           | 0.009 $\pm$ 0.001 | 0.016 $\pm$ 0.006 | 0.017 $\pm$ 0.007 | 0.025 $\pm$ 0.003 |
| LCA    | $\alpha$ -D-Man, Fuc $\alpha$ -1,6GlcNAc, $\alpha$ -D-Glc                                                | 0.187 $\pm$ 0.013 | 0.099 $\pm$ 0.037 | 0.09 $\pm$ 0.053  | 0.044 $\pm$ 0.012 |
| RCA120 | $\beta$ -Gal, Gal $\beta$ -1,4GlcNAc (type II), Gal $\beta$ 1-3GlcNAc (type I)                           | 0 $\pm$ 0         | 0.014 $\pm$ 0.005 | 0.028 $\pm$ 0.002 | 0.021 $\pm$ 0.002 |
| STL    | trimers and tetramers of GlcNAc, core (GlcNAc) of N-glycan, oligosaccharide containing GlcNAc and MurNAc | 0.033 $\pm$ 0.007 | 0.026 $\pm$ 0.012 | 0.049 $\pm$ 0.012 | 0.04 $\pm$ 0.007  |

|        |                                                                             |                   |                   |                   |                   |
|--------|-----------------------------------------------------------------------------|-------------------|-------------------|-------------------|-------------------|
| BS-I   | $\alpha$ -Gal, $\alpha$ -GalNAc, Gal $\alpha$ -1,3Gal, Gal $\alpha$ -1,6Glc | 0.008 $\pm$ 0.006 | 0.016 $\pm$ 0.004 | 0.035 $\pm$ 0.007 | 0.032 $\pm$ 0.002 |
| PTL-II | Gal, blood group H, T-antigen                                               | 0.01 $\pm$ 0.002  | 0.013 $\pm$ 0.003 | 0.02 $\pm$ 0.008  | 0.026 $\pm$ 0.003 |
| NPA    | High-Mannose, Man $\alpha$ 1-6Man                                           | 0.003 $\pm$ 0.004 | 0.012 $\pm$ 0.007 | 0.018 $\pm$ 0.005 | 0.031 $\pm$ 0.004 |
| PSA    | $\alpha$ -D-Man, Fuc $\alpha$ -1,6GlcNAc, $\alpha$ -D-Glc                   | 0.037 $\pm$ 0.009 | 0.029 $\pm$ 0.005 | 0.027 $\pm$ 0.004 | 0.021 $\pm$ 0.002 |
| ACA    | Gal $\beta$ 1-3GalNAc $\alpha$ -Ser/Thr (T)                                 | 0.028 $\pm$ 0.002 | 0.032 $\pm$ 0.002 | 0.038 $\pm$ 0.013 | 0.046 $\pm$ 0.004 |
| UEA-I  | Fuc $\alpha$ 1-2Gal $\beta$ 1-4Glc(NAc)                                     | 0.01 $\pm$ 0.009  | 0.019 $\pm$ 0.001 | 0.019 $\pm$ 0.005 | 0.032 $\pm$ 0.002 |
| BPL    | Gal $\beta$ 1-3GalNAc, Terminal GalNAc                                      | 0.033 $\pm$ 0.007 | 0.031 $\pm$ 0.001 | 0.018 $\pm$ 0.008 | 0.032 $\pm$ 0.004 |

---

Supporting Table 6. Fold change of the serum glycopatterns based upon ratio of the NFIs of each lectin from HVs, BPD, SqCC-ES and SqCC-AS patients.

| Lectin  | Specificity                                                                                              | Compared with HV ( <i>p</i> value) <sup>a</sup> |              |             | Compared with each other ( <i>p</i> value) <sup>b</sup> |             |                 |
|---------|----------------------------------------------------------------------------------------------------------|-------------------------------------------------|--------------|-------------|---------------------------------------------------------|-------------|-----------------|
|         |                                                                                                          | BPD/HV                                          | SqCC-ES/HV   | SqCC-AS/HV  | SqCC-ES/BPD                                             | SqCC-AS/BPD | SqCC-AS/SqCC-ES |
| GSL-I   | $\alpha$ GalNAc, $\alpha$ Gal, anti-A and B                                                              | 2.37(0.025)                                     | 1.80(0.001)  | 1.82(0.037) | -                                                       | -           | -               |
| LEL     | (GlcNAc) <sub>n</sub> , high mannose-type N-glycans                                                      | -                                               | 1.80(<0.001) | 1.94(0.003) | -                                                       | -           | -               |
| ACA     | Gal $\beta$ 1-3GalNAc $\alpha$ -Ser/Thr (T)                                                              | -                                               | -            | 1.68(0.004) | -                                                       | -           | -               |
| PSA     | $\alpha$ -D-Man, Fuc $\alpha$ -1,6GlcNAc, $\alpha$ -D-Glc                                                | -                                               | -            | 0.58(0.019) | -                                                       | -           | -               |
| STL     | trimers and tetramers of GlcNAc, core (GlcNAc) of N-glycan, oligosaccharide containing GlcNAc and MurNAc | -                                               | -            | -           | 1.85(0.006)                                             | 1.51(0.002) | -               |
| MAL-II  | Sia $\alpha$ 2-3Gal $\beta$ 1-4Glc(NAc)/Glc                                                              | -                                               | -            | -           | 0.64(0.011)                                             | 0.54(0.008) | -               |
| Jacalin | Gal $\beta$ 1-3GalNAc $\alpha$ -Ser/Thr(T), GalNAc $\alpha$ -Ser/Thr(Tn)                                 | 0.58(0.043)                                     | 0.27(0.043)  | 0.22(0.002) | 0.48(0.019)                                             | 0.38(0.026) | -               |
| LCA     | $\alpha$ -D-Man, Fuc $\alpha$ -1,6GlcNAc, $\alpha$ -D-Glc                                                | 0.53(0.013)                                     | 0.48(0.008)  | 0.23(0.035) | -                                                       | 0.44(0.008) | 0.48(0.013)     |

|        |                                                                                                |             |              |              |              |              |              |
|--------|------------------------------------------------------------------------------------------------|-------------|--------------|--------------|--------------|--------------|--------------|
| BPL    | Gal $\beta$ 1-3GalNAc, Terminal GalNAc                                                         | -           | 0.54(0.038)  | -            | 0.58(0.015)  | -            | 1.79(0.008)  |
| SJA    | Terminal in GalNAc and Gal                                                                     | -           | -            | 0.52(0.012)  | -            | 0.58(0.003)  | -            |
| EEL    | Gal $\alpha$ 1-3(Fuc $\alpha$ 1-2) Gal (blood group B antigen)                                 | 6.71(0.038) | 14.34(0.003) | 21.81(0.001) | 2.14(<0.001) | 3.25(<0.001) | 1.52(0.0029) |
| BS-I   | $\alpha$ -Gal, $\alpha$ -GalNAc, Gal $\alpha$ -1,3Gal, Gal $\alpha$ -1,6Glc                    | 2.07(0.027) | 4.58(<0.001) | 4.14(0.002)  | 2.21(<0.001) | 2.00(0.005)  | -            |
| NPA    | High-Mannose, Man $\alpha$ 1-6Man                                                              | 4.66(0.042) | 6.84(0.005)  | 11.62(0.020) | -            | 2.50(0.002)  | 1.70(0.015)  |
| UEA-I  | Fuc $\alpha$ 1-2Gal $\beta$ 1-4Glc(NAc)                                                        | 1.91(0.047) | 1.93(0.037)  | 3.19(0.001)  | -            | 1.67(<0.001) | 1.66(0.023)  |
| RCA120 | $\beta$ -Gal, Gal $\beta$ -1,4GlcNAc (type II), Gal $\beta$ 1-3GlcNAc (type I)                 | /(<0.001)   | /(<0.001)    | /(<0.001)    | 2.02(<0.001) | -            | -            |
| DBA    | $\alpha$ GalNAc, Tn antigen, GalNAc $\alpha$ 1-3(Fuc $\alpha$ 1-2) Gal (blood group A antigen) | 1.87(0.028) | 1.97(0.046)  | 2.87(0.018)  | -            | 1.54(0.006)  | -            |
| MPL    | Gal $\beta$ 1-3GalNAc, GalNAc                                                                  | -           | 3.23(0.012)  | 2.58(0.019)  | 2.65(0.015)  | 2.11(0.028)  | -            |
| PTL-II | Gal, blood group H, T-antigen                                                                  | -           | 2.01(0.030)  | 2.59(0.010)  | 1.54(0.003)  | 1.99(0.010)  | -            |
| HHL    | High-Mannose, Man $\alpha$ 1-3Man, Man $\alpha$ 1-6Man, Man5-GlcNAc2-Asn                       | 2.06(0.017) | -            | 1.71(0.015)  | 0.58(0.015)  | -            | -            |

---

<sup>a</sup> The NFIs of each lectin from HB, BPD, SqCC-ES and SqCC-AS groups were compared with that from HV group based on their fold change (i.e., BPD/HB, SqCC-ES/HV, and SqCC-AS/HV), respectively.

<sup>b</sup> The NFIs of each lectin from three disease groups were compared with that from BPD group based on their fold change and compared with each other on their fold change (i.e., SqCC-ES/BPD, SqCC-AS/BPD, and SqCC-AS/SqCC-ES. -, no significant difference; /, the denominator of the fold change was zero).
